# Supplementary material for: Reactive, Adult Neurogenesis From Increased Neural Progenitor Cell Proliferation Following Alcohol Dependence in Female Rats
Source: PubMed Central journal article supplement (PMC8477003; doi:10.3389/fnins.2021.689601), 2021-09-14
Supplement: Image_1.pdf [file Image_1.pdf]

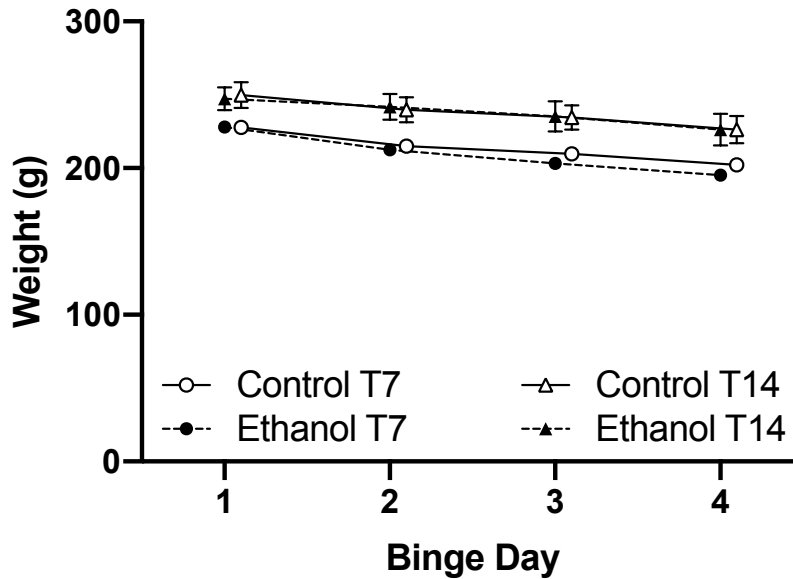

**Supplemental Figure 1:** Regardless of ethanol exposure, binge procedures result in weight loss for all groups. A three-way repeated measures ANOVA found significant main effects of binge day ( $p < 0.0001$ ) and abstinence time point ( $p < 0.0001$ ), but not ethanol exposure. As there were differences in starting weights between the T7 and T14 abstinence time points, but a similar weight loss trajectory for all groups, we observed a binge day by abstinence time point interaction ( $p = 0.0001$ ). Furthermore, there was a binge day by abstinence time point by ethanol exposure interaction ( $p = 0.03$ ). Bonferroni corrections revealed no significant differences in weight between the control and ethanol groups within abstinence time points across the binge days.
